# Supplementary material
Source: PubMed Central journal article supplement (PMC9150910)
Supplement: mmc2.pdf [file mmc2.pdf]

**Supp file 1.**  
**Prevalence of RNAemia and Seropositive patients depending on the presence of N-antigenemia**

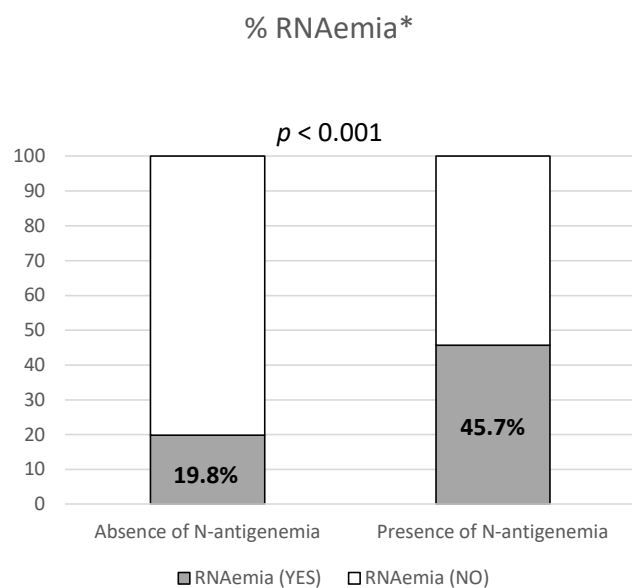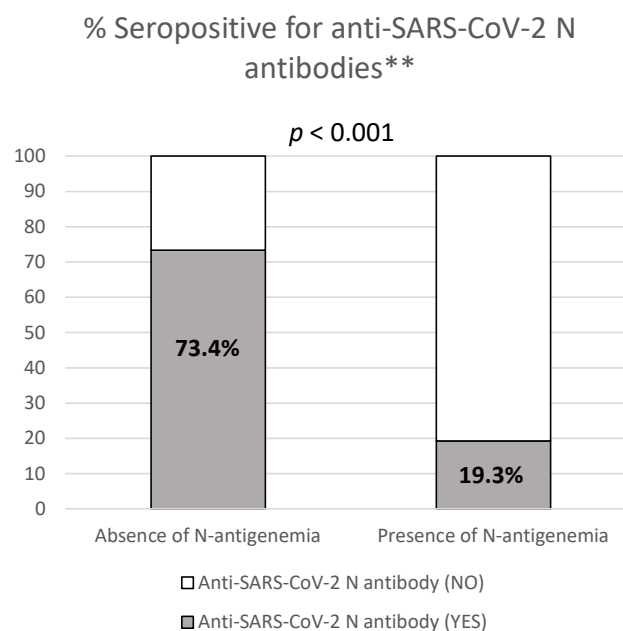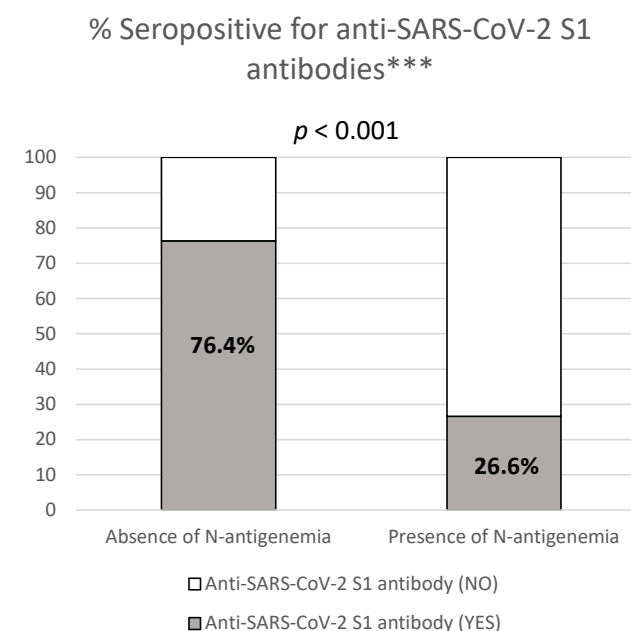

\*Patients with antigenemia showed higher levels of viral RNA in plasma (copies of N1 /mL: 250 (1449) vs 4432 (29096) [mean, (SD)]

\*\* Patients with antigenemia showed lower levels of anti SARS-CoV-2 N antibodies (AUs/mL: 3.9 (2.8) vs 0.9 (1.7) [mean, (SD)]

\*\*\* Patients with antigenemia showed lower levels of anti SARS-CoV-2 S1 antibodies (AUs/mL: 2203 (5333) vs 189 (938)[mean, (SD)]
